# Supplementary material for: Folding of a LysM Domain: Entropy-Enthalpy Compensation in the Transition State of an Ideal Two-state Folder
Source: PubMed Central journal article supplement (PMC2441773; doi:10.1016/j.jmb.2008.05.020), 2008-07-11
Supplement: mmc1.pdf [file mmc1.pdf]

# **Folding of a LysM domain: entropy-enthalpy compensation in the transition state of an ‘ideal’ two-state folder**

Adrian A. Nickson, Kate E. Stoll<sup>1</sup> and Jane Clarke<sup>†</sup>

University of Cambridge Department of Chemistry, MRC Centre for Protein Engineering, Lensfield Road, Cambridge, CB2 1EW, UK.

<sup>1</sup>Current Address: Department of Biochemistry, Box 357350, University of Washington, Seattle, WA 98195, USA.

<sup>†</sup>Corresponding author; e-mail: [jc162@cam.ac.uk](mailto:jc162@cam.ac.uk); tel: +44 (0) 1223 336426.

## **Supplementary Materials**

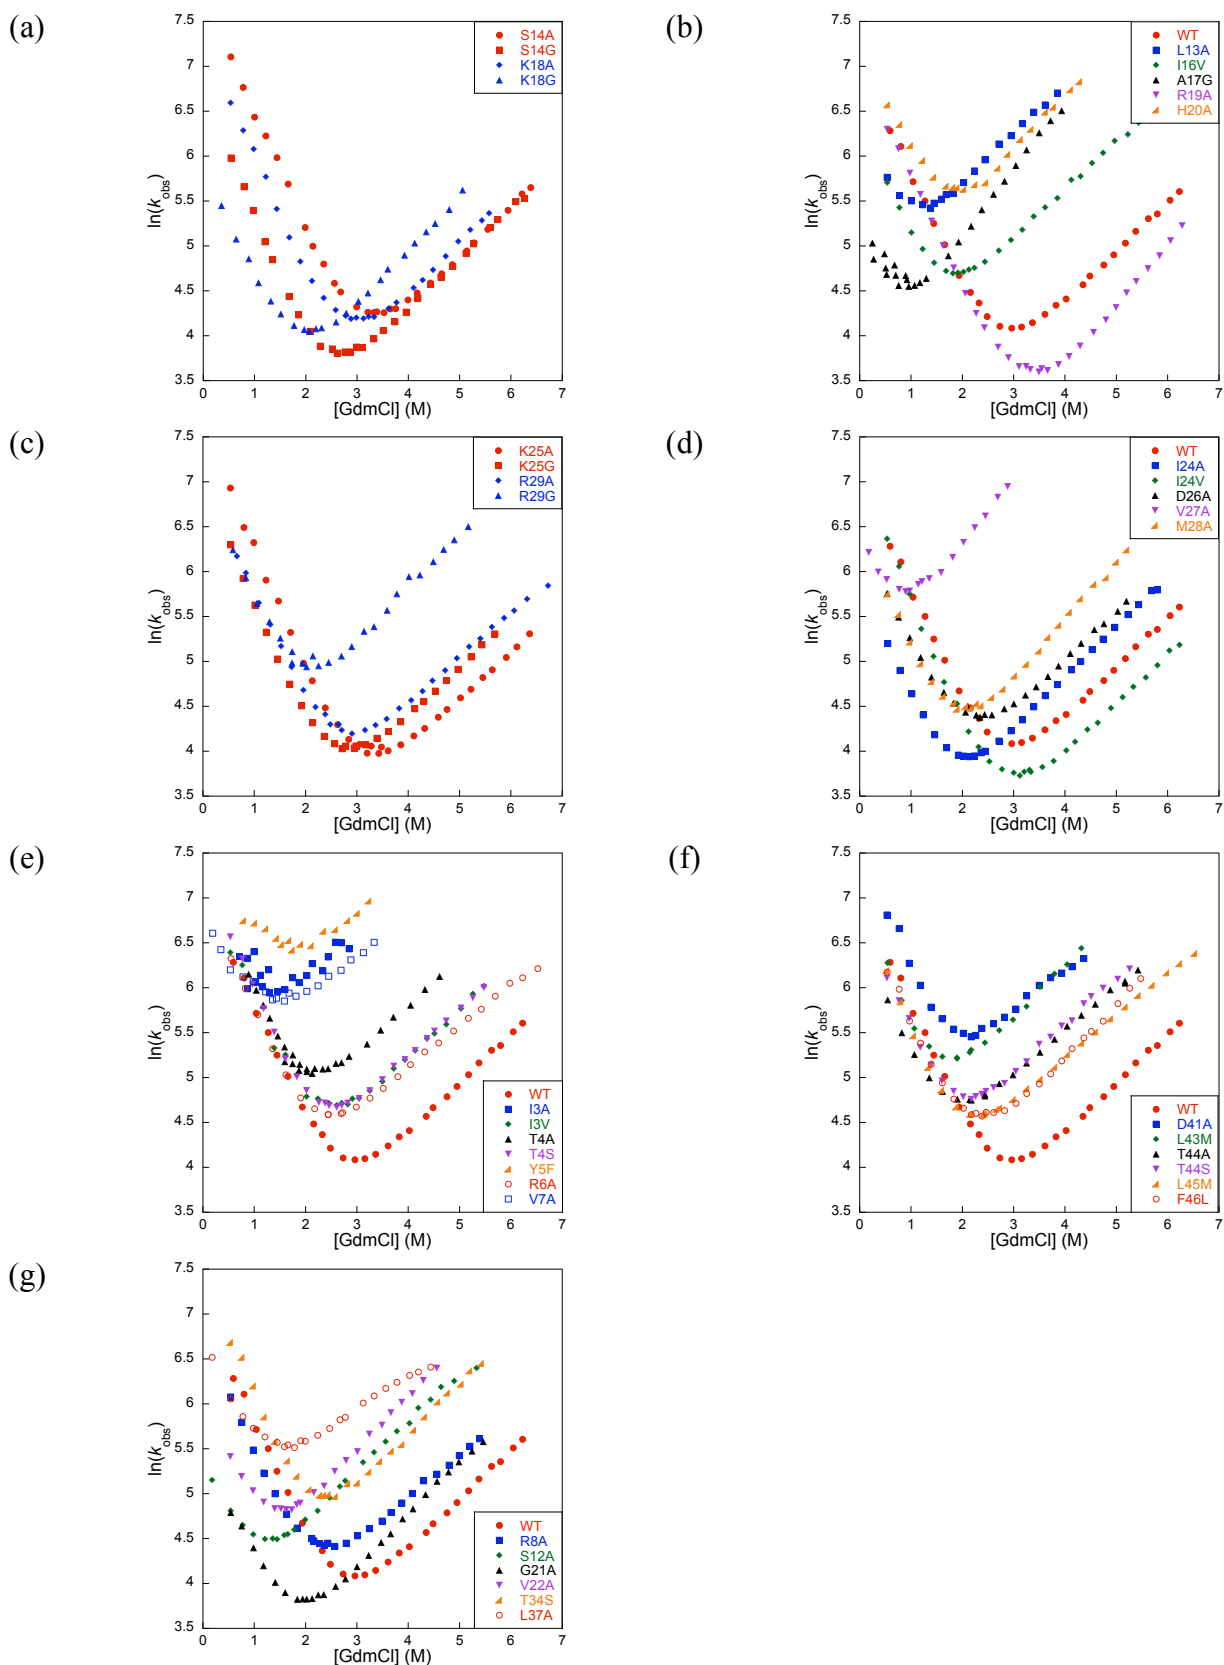

**Supplementary Figure 1.** Chevron plots for LysM mutants. (a) Helix 1: Ala→Gly scanning mutations. (b) All other mutations in helix 1. (c) Helix 2: Ala→Gly scanning mutations. (d) All other mutations in helix 2. (e) Mutations within  $\beta$ -strand 1. (f) Mutations within  $\beta$ -strand 2. (g) Mutations in the turns and loops between elements of secondary structure.

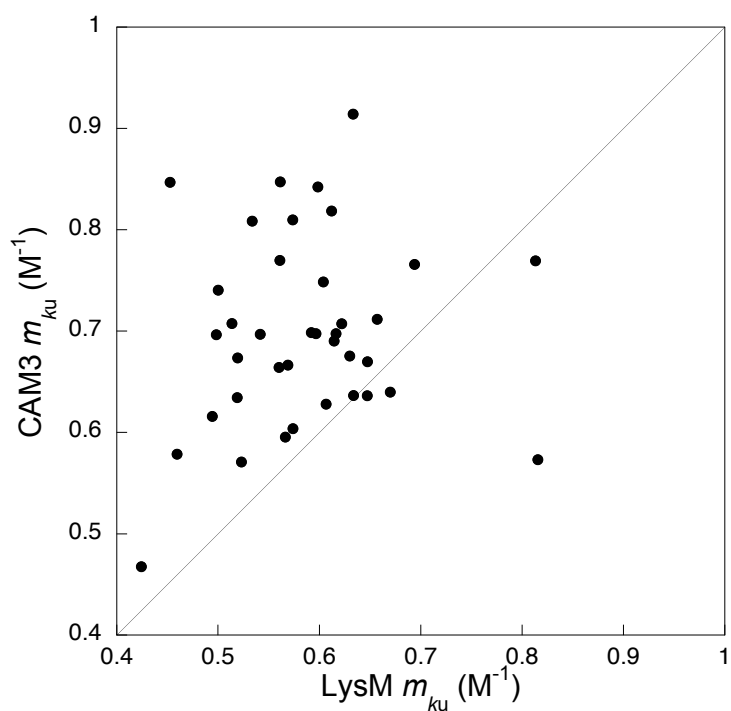

**Supplementary Figure 2.** Comparison of unfolding  $m$ -values,  $m_{ku}$ , for LysM and CAM3. The  $m_{ku}$  values from LysM are plotted against the  $m_{ku}$  values of the same mutant in CAM3. The unfolding  $m$ -values for CAM3 are consistently higher than those for LysM, suggesting that the transition state of CAM3 is less structured than that of LysM.

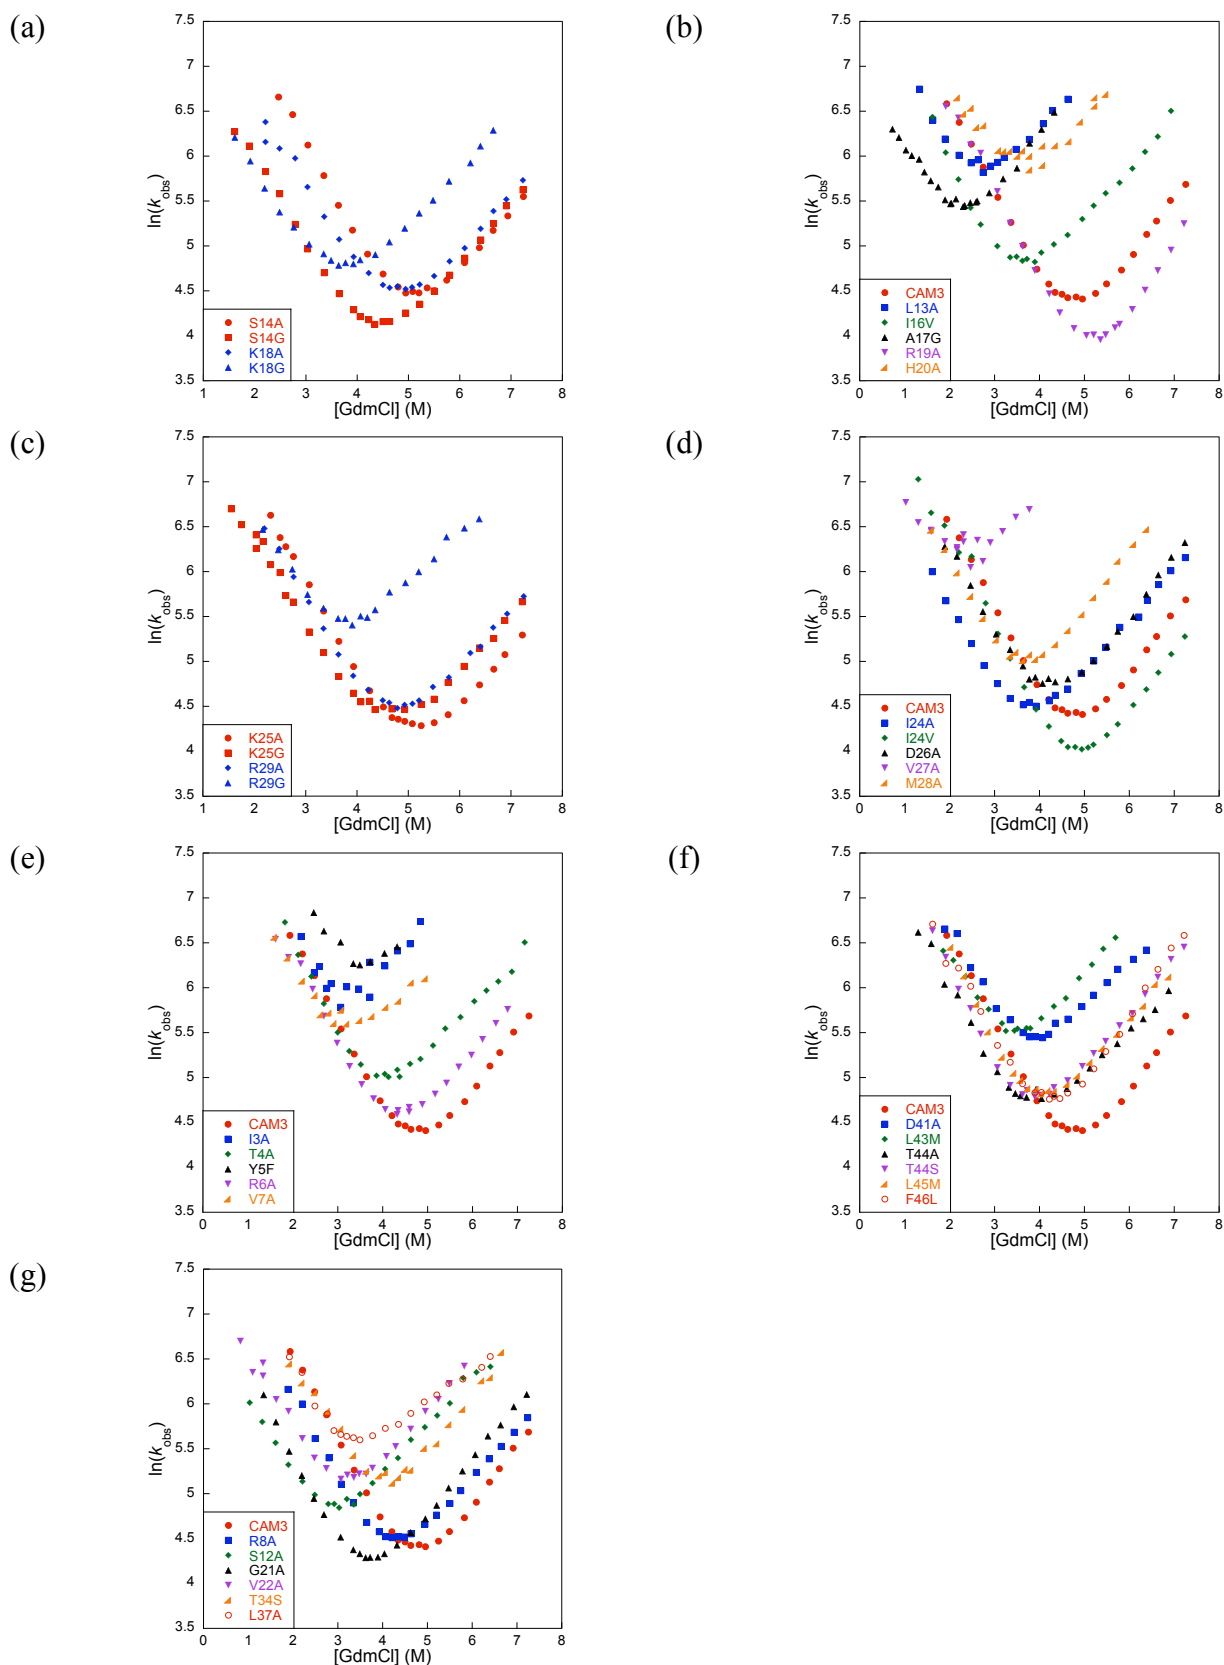

**Supplementary Figure 3.** Chevron plots for mutants of circular protein CAM3. (a) Helix 1: Ala→Gly scanning mutations. (b) All other mutations in helix 1. (c) Helix 2: Ala→Gly scanning mutations. (d) All other mutations in helix 2. (e) Mutations within  $\beta$ -strand 1. (f) Mutations within  $\beta$ -strand 2. (g) Mutations in the turns and loops between elements of secondary structure.

**Supplementary Table 1.** Contacts lost upon mutation of LysM.

|          | Mutant                                                                      | Residues to which contacts have been lost                               |
|----------|-----------------------------------------------------------------------------|-------------------------------------------------------------------------|
| Strand 1 | I3A                                                                         | D1 T4 Y5 <b>H20</b> V22 <b>L45</b> V47 K48                              |
|          | I3V                                                                         | D1 <u>H20</u> V22 L45 V47 K48                                           |
|          | T4A                                                                         | <u>S2</u> I3 R6 <u>K42</u> T44                                          |
|          | T4S                                                                         | R6 K42                                                                  |
|          | Y5F                                                                         | V7 L13 I16 L37 L43                                                      |
|          | R6A                                                                         | T4 D41 <b>K42</b>                                                       |
|          | V7A                                                                         | <b>Y5</b> R6 D11 <u>L13</u> I16 <u>L37</u> L43 D41                      |
| Turn 1   | R8A                                                                         | R6 K9 <b>D11</b> P39                                                    |
|          | S12A                                                                        | L13 S14 S15                                                             |
| Helix 1  | L13A                                                                        | <b>Y5</b> <u>V7</u> S12 I16 <u>I24</u> V27 T34 <b>L37</b> <u>L43</u>    |
|          | S14A                                                                        | S12 L13 S15 I24                                                         |
|          | S14G                                                                        | S12 L13 S15 A17 I24                                                     |
|          | S14A→G                                                                      | S12 L13 S15 A17 I24                                                     |
|          | S15A                                                                        | D11 S12 I16 K18                                                         |
|          | S15G                                                                        | D11 S12 S14 I16 K18                                                     |
|          | S15A→G                                                                      | S12 S14 I16 K18                                                         |
|          | I16V                                                                        | <u>Y5</u> <u>V7</u> D11 S12 L13 S15                                     |
|          | A17G                                                                        | S14 I16 K18 H20 V22 I24 L45 V47                                         |
|          | K18A                                                                        | None                                                                    |
|          | K18G                                                                        | S15 A17 R19                                                             |
|          | K18A→G                                                                      | S15 A17 R19                                                             |
|          | R19A                                                                        | I16 <b>H20</b>                                                          |
| H20A     | <b>I3</b> <b>Y5</b> <u>I16</u> A17 <b>R19</b> <b>V22</b> I24 <b>L45</b> V47 |                                                                         |
| Turn 2   | G21A                                                                        | None                                                                    |
|          | V22A                                                                        | I3 I16 A17 <u>H20</u> I24 V27 <u>L45</u> <u>V47</u> K48                 |
| Helix 2  | I24A                                                                        | Y5 <u>L13</u> S14 I16 A17 H20 V22 M28 <u>V27</u> L45 V47                |
|          | I24V                                                                        | Y5 L13 S14 I16 A17 H20 V22 V27 L45 V47                                  |
|          | K25A                                                                        | <b>N23</b> <b>D26</b>                                                   |
|          | K25G                                                                        | <b>N23</b> I24 <b>D26</b> M28                                           |
|          | K25A→G                                                                      | N23 I24 D26 M28                                                         |
|          | D26A                                                                        | <b>N23</b> <b>K25</b> <u>R29</u> <b>W30</b> V47                         |
|          | V27A                                                                        | Y5 L13 V22 <u>I24</u> D26 M28 <u>W30</u> N31 T34 L43 T44 <u>L45</u> V47 |
|          | M28A                                                                        | I24 K25 V27 <u>T34</u> L37                                              |
|          | R29A                                                                        | <u>D26</u> <b>W30</b>                                                   |
|          | R29G                                                                        | <b>D26</b> M28 <b>W30</b>                                               |
| R29A→G   | D26 M28 <u>W30</u>                                                          |                                                                         |
| Loop     | T34S                                                                        | L13 V27 M28 N31 L37 L43                                                 |
|          | L37A                                                                        | Y5 <u>V7</u> <b>L13</b> M28 <u>T34</u> N36 D41 <b>L43</b>               |
| Strand 2 | D41A                                                                        | <u>N36</u> <u>Q38</u> <u>K42</u>                                        |
|          | L43M*                                                                       | <b>Y5</b> V7 <u>L13</u> V27 N31 T34 N36 <u>L37</u> T44                  |
|          | T44A                                                                        | S2 T4 V27 <u>W30</u> <u>N31</u> L45 <b>F46</b>                          |
|          | T44S                                                                        | S2 V27 <u>W30</u> N31 L45 <u>F46</u>                                    |
|          | L45M*                                                                       | <u>I3</u> <b>Y5</b> I16 A17 <b>H20</b> <u>V22</u> I24 V27 L43 V47       |
| F46L     | <u>S2</u> <u>W30</u> <u>T44</u>                                             |                                                                         |

A contact was counted if it involved two side-chain heavy atoms and fell within a distance cut-off of 6 Å. A minimal loss of interactions between two residues ( $\leq 5$  contacts) is indicated by plain text, a moderate loss ( $\leq 10$  contacts) is indicated by underlined text and significant loss of interactions ( $> 10$  contacts) is indicated in **bold**. \*The L→M mutations are non-conservative and so the list of residues shows potential contacts lost, not actual contacts lost.
